# Supplementary material for: Inflammatory Biomarkers, Microbiome, Depression, and Executive Dysfunction in Alcohol Users
Source: PubMed Central journal article supplement (PMC7037324; doi:10.3390/ijerph17030689), 2020-01-21
Supplement: ijerph-17-00689-s001.pdf [file ijerph-17-00689-s001.pdf]

**Supplementary Table 1.** Nutrients consumed based on reported dietary intake in the last month.

| Nutrient                            | All Samples (n = 50)    | Alcohol (n = 30)        | Control (n = 20)        | p-value |
|-------------------------------------|-------------------------|-------------------------|-------------------------|---------|
|                                     | Median (IQR)            | Median (IQR)            | Median (IQR)            |         |
| Acesulfame Potassium (mg)           | 0.00 (0.0-0.0)          | 0.00 (0.0-0.0)          | 0.00 (0.0-0.0)          | 0.736   |
| Added Sugars (gm)                   | 40.21 (19.1-85.7)       | 43.79 (18.7-99.7)       | 40.21 (19.4-78.9)       | 0.766   |
| Alanine (gm)                        | 3.30 (1.6-4.9)          | 40.04 (16.7-90.2)       | 36.63 (17.3-70.6)       | 0.707   |
| Alcohol (gm)                        | 7.13 (0.4-32.2)         | 16.75 (7.9-56.9)        | 0.04 (0.02-1.84)        | 0.000*  |
| Alpha-Carotene (mcg)                | 223.69 (118.7-649.7)    | 205.12 (70.2-780.1)     | 265.58 (146.2-511.8)    | 0.874   |
| Alpha-toc eq (mg)                   | 7.14 (4.3-10.2)         | 7.56 (3.5-12.9)         | 6.91 (5.1-8.4)          | 0.797   |
| Apha-Tocopherol (mg)                | 5.59 (3.5-8.0)          | 5.82 (2.8-9.6)          | 5.59 (3.9-7.1)          | 0.843   |
| Arginine (gm)                       | 3.54 (1.7-5.1)          | 3.57 (1.4-5.4)          | 3.54 (2.4-5.0)          | 0.579   |
| Ash (gm)                            | 15.55 (9.4-23.7)        | 14.97 (9.4-26.9)        | 17.69 (9.1-23.5)        | 0.968   |
| Aspartame (mg)                      | 0.00 (0.0-10.9)         | 0.00 (0.00-5.5)         | 1.23 (0.00-15.3)        | 0.177   |
| Aspartic acid (gm)                  | 6.18 (2.9-9.5)          | 6.36 (2.6-9.5)          | 5.97 (3.9-9.7)          | 0.707   |
| Beta-Carotene (mcg)                 | 1363.68 (852.9-3374.8)  | 996.96 (708.2-3563.4)   | 1644.50 (919.2-3154.9)  | 0.452   |
| Beta-Cryptoxantin (mcg)             | 42.66 (18.6-93.8)       | 42.66 (16.8-94.4)       | 41.45 (21.2-96.3)       | 0.890   |
| Betaine (mg)                        | 124.52 (83.4-209.1)     | 150.9 (92.8-238.0)      | 105.23 (74.2-176.6)     | 0.227   |
| Beta-Tocopherol (mg)                | 0.33 (0.2-0.5)          | 0.30 (0.18-0.61)        | 0.33 (0.23-0.39)        | 0.782   |
| Biochanin A (mg)                    | 0.004 (0.001-0.007)     | 0.004 (0.001-0.007)     | 0.004 (0.001-0.007)     | 0.812   |
| Caffeine (mg)                       | 62.38 (17.8-230.7)      | 80.03 (17.8-215.1)      | 56.57 (12.6-253.1)      | 0.859   |
| Calcium (mg)                        | 702.56 (433.7-1143.6)   | 588.21 (433.87-1461.6)  | 866.36 (429.2-1097.9)   | 0.452   |
| Energy (Kcal)                       | 1747.47 (1134.9-2990.7) | 1747.47 (1155.4-3271.9) | 1669.15 (1025.9-2350.6) | 0.313   |
| Total Carbohydrate (gm)             | 195.63 (127.6-335.8)    | 200.92 (128.2-408.3)    | 183.09 (118.1-313.3)    | 0.406   |
| Cholesterol (mg)                    | 240.54 (97.9-342.7)     | 212.43 (83.4-358.4)     | 275.47 (168.9-343.9)    | 0.243   |
| Choline (mg)                        | 313.66 (177.3-545.6)    | 312.80 (165.2-600.7)    | 318.53 (181.2-454.5)    | 0.890   |
| CLA cis-9, trans-11 (gm)            | 0.08 (0.05-0.14)        | 0.08 (0.05-0.15)        | 0.08 (0.06-0.12)        | 0.722   |
| CLA trans-10, cis-12 (gm)           | 0.02 (0.01-0.03)        | 0.02 (0.01-0.03)        | 0.02 (0.01-0.03)        | 0.890   |
| Copper (gm)                         | 1.16 (0.6-1.5)          | 1.16 (0.6-1.6)          | 1.14 (0.6-1.3)          | 0.552   |
| Coumestrol (mg)                     | 0.06 (0.02-0.12)        | 0.07 (0.02-0.12)        | 0.06 (0.02-0.13)        | 0.507   |
| Cystine (gm)                        | 0.87 (0.4-1.2)          | 0.87 (0.4-1.5)          | 0.87 (0.6-1.2)          | 0.607   |
| Daidzein (mg)                       | 0.13 (0.5-0.3)          | 0.13 (0.04-0.25)        | 0.13 (0.8-0.29)         | 0.859   |
| Delta-Tocopherol (mg)               | 2.19 (1.3-3.5)          | 2.10 (1.2-3.9)          | 2.19 (1.4-3.2)          | 0.766   |
| Erythritol (g)                      | 0.0002 (0.0001-0.0005)  | 0.0001 (0.0000-0.0005)  | 0.0003 (0.0001-0.0007)  | 0.178   |
| Total Fat (gm)                      | 58.34 (34.0-89.7)       | 58.13 (28.9-103.8)      | 58.34 (45.6-77.1)       | 0.874   |
| Dietary Fiber (gm)                  | 12.61 (7.4-19.3)        | 12.20 (5.9-12.6)        | 13.45 (7.5-18.5)        | 0.937   |
| Water Sol Dietary Fiber (gm)        | 4.44 (2.52-6.57)        | 4.59 (2.4-8.2)          | 4.04 (2.7-6.4)          | 0.722   |
| Insoluble Dietary Fiber (gm)        | 7.42 (4.6-12.9)         | 7.31 (3.9-13.3)         | 8.55 (4.7-12.6)         | 0.812   |
| Folate-dietary equivalents (mcg)    | 391.01 (264.5-577.7)    | 391.01 (250.8-582.6)    | 391.51 (271.9-563.2)    | 0.984   |
| Folate-natural (food folate) (mcg)  | 182.02 (100.7-263.0)    | 180.23 (111.6-264.8)    | 184.57 (100.4-226.6)    | 0.678   |
| Folate-synthetic (folic acid) (mcg) | 120.30 (87.7-193.5)     | 121.09 (77.4-203.2)     | 120.30 (101.9-187.9)    | 0.649   |
| Formononetin (mg)                   | 0.0003 (0.0001-0.0007)  | 0.0003 (0.0000-0.0007)  | 0.0004 (0.0001-0.0007)  | 0.789   |
| Fructose (gm)                       | 17.90 (9.14-36.65)      | 18.68 (8.9-56.2)        | 16.68 (10.3-27.5)       | 0.579   |
| Galactose (gm)                      | 0.31 (0.1-0.6)          | 0.31 (0.08-0.63)        | 0.30 (0.11-0.54)        | 0.890   |
| Gamma-Tocopherol (mg)               | 10.69 (5.9-16.7)        | 11.21 (5.7-21.5)        | 10.69 (5.9-14.5)        | 0.440   |
| Genistein (mg)                      | 0.15 (0.1-0.3)          | 0.14 (0.05-0.21)        | 0.15 (0.06-0.33)        | 0.440   |

|                               |                          |                           |                         |       |
|-------------------------------|--------------------------|---------------------------|-------------------------|-------|
| Glucose (gm)                  | 18.97 (9.2-35.2)         | 19.03 (9.1-56.9)          | 17.34 (10.5-29.9)       | 0.722 |
| Glutamic acid (gm)            | 13.79 (7.1-21.3)         | 13.12 (6.7-21.3)          | 14.11 (8.9-20.4)        | 0.678 |
| Glycine (gm)                  | 2.80 (1.31-3.93)         | 3.05 (1.1-4.2)            | 2.70 (1.9-3.9)          | 0.736 |
| Glycitein (gm)                | 0.009 (0.005-0.025)      | 0.007 (0.005-0.018)       | 0.013 (0.007-0.033)     | 0.137 |
| Gram Amount                   | 3170.60 (1575.9-4648.5)  | 3273.92 (2056.4-5573.9)   | 2972.84 (1320.8-3916.9) | 0.259 |
| Histidine (gm)                | 1.92 (0.8-2.9)           | 1.93 (0.8-3.0)            | 1.91 (1.3-2.8)          | 0.526 |
| Inositol (g)                  | 0.10 (0.03-0.20)         | 0.12 (0.02-0.28)          | 0.07 (0.03-0.16)        | 0.406 |
| Iron (mg)                     | 10.18 (6.8-16.7)         | 9.64 (5.8-17.6)           | 11.38 (7.0-14.9)        | 0.953 |
| Isoleucine (gm)               | 3.19 (1.4-4.9)           | 3.23 (2.0-4.7)            | 3.16 (2.0-4.7)          | 0.579 |
| Isomalt (g)                   | 0.00 (0.0-0.0)           | 0.00 (0.0-0.0)            | 0.00 (0.0-0.0)          | 1.000 |
| Energy (kj)                   | 7311.41 (4748.5-12513.3) | 7311.41 (48.34.3-13689.9) | 6983.71 (4292.8-9834.8) | 0.313 |
| Lactitol (g)                  | 0.00 (0.0-0.0)           | 0.00 (0.0-0.0)            | 0.00 (0.0-0.0)          | 1.000 |
| Lactose (gm)                  | 11.58 (6.5-22.8)         | 10.91 (7.6-25.4)          | 12.70 (5.2-24.7)        | 0.968 |
| Leucine (gm)                  | 3.39 (2.5-8.4)           | 5.38 (2.3-8.5)            | 5.47 (3.4-8.2)          | 0.464 |
| Lutein + Zeaxanthin (mcg)     | 814.50 (465.4-1501.5)    | 859.29 (442.3-1501.5)     | 803.04 (491.7-1559.3)   | 0.968 |
| Lycopene (mcg)                | 4403.72 (2027.9-6196.2)  | 4544.85 (1992.9-6345.5)   | 4094.10 (2109.7-5736.1) | 0.722 |
| Lysine (gm)                   | 4.59 (2.1-7.3)           | 4.56 (1.9-7.7)            | 4.59 (2.9-7.1)          | 0.539 |
| Magnesium (mg)                | 255.08 (150.4-437.5)     | 240.66 (159.6-465.0)      | 294.12 (139.9-386.7)    | 0.751 |
| Maltitol (g)                  | 0.00 (0.0-0.0)           | 0.00 (0.0-0.0)            | 0.00 (0.0-0.0)          | 0.110 |
| Maltose (gm)                  | 2.41 (1.1-3.8)           | 2.36 (0.9-4.3)            | 2.41 (1.4-3.6)          | 0.797 |
| Manganese (mg)                | 2.31 (1.4-3.5)           | 2.32 (1.2-4.2)            | 2.34 (1.5-3.5)          | 0.937 |
| Mannitol (g)                  | 0.15 (0.09-0.23)         | 0.14 (0.8-0.2)            | 0.15 (0.1-0.2)          | 1.000 |
| Methylhistidine (mg)          | 11.78 (5.2-21.7)         | 9.91 (4.1-22.3)           | 12.35 (6.9-17.9)        | 0.394 |
| Methionine (gm)               | 1.58 (0.7-2.5)           | 1.52 (0.6-2.6)            | 1.58 (1.0-2.4)          | 0.488 |
| MFA 14:1 (gm)                 | 0.07 (0.04-0.13)         | 0.08 (0.03-0.14)          | 0.07 (0.05-0.11)        | 0.843 |
| MFA 16:1 (gm)                 | 0.90 (0.5-1.4)           | 0.90 (0.4-1.4)            | 0.94 (0.6-1.4)          | 0.678 |
| MFA 18:1, oleic acid (gm)     | 19.53 (11.6-29.6)        | 21.23 (9.9-34.8)          | 19.09 (15.5-26.6)       | 0.843 |
| MFA 20:1 (gm)                 | 0.21 (0.12-0.31)         | 0.21 (0.10-0.34)          | 0.20 (0.15-0.26)        | 0.921 |
| MFA 22:1 (gm)                 | 0.007 (0.004-0.028)      | 0.007 (0.003-0.016)       | 0.007 (0.004-0.056)     | 0.303 |
| Total MFA (gm)                | 21.02 (12.4-32.1)        | 22.45 (10.7-37.7)         | 20.45 (16.5-28.9)       | 0.905 |
| Natural Alpha-Tocopherol (mg) | 5.59 (3.5-7.7)           | 5.80 (2.8-8.7)            | 5.59 (3.7-7.0)          | 0.736 |
| Niacin (mg)                   | 18.61 (13.1-31.8)        | 20.14 (13.1-35.0)         | 10.47 (12.8-23.2)       | 0.384 |
| Niacin Equivalents (mg)       | 34.55 (20.1-51.8)        | 33.19 (19.4-58.6)         | 34.84 (21.4-44.0)       | 0.812 |
| Nitrogen (mg)                 | 11.43 (5.4-18.1)         | 11.50 (5.3-18.5)          | 11.40 (7.3-17.4)        | 0.797 |
| Omega-3 Fatty Acids (mg)      | 1.56 (0.8-2.1)           | 1.62 (0.8-2.1)            | 1.32 (0.8-1.9)          | 0.488 |
| Oxalic Acid (mg)              | 111.14 (67.3-169.6)      | 122.35 (64.3-184.5)       | 94.86 (80.1-162.3)      | 0.607 |
| Pantheoteic Acid (mg)         | 4.26 (2.49-7.43)         | 4.15 (2.5-9.0)            | 4.31 (2.3-7.2)          | 0.953 |
| Pectins (gm)                  | 1.39 (0.7-2.2)           | 1.50 (0.7-2.2)            | 1.26 (0.7-2.2)          | 0.937 |
| PFA 18:2, linoleic acid (gm)  | 11.15 (6.4-15.5)         | 11.62 (5.9-19.5)          | 11.13 (7.1-13.2)        | 0.635 |
| PFA 18:3, linoleic acid (gm)  | 1.47 (0.7-1.9)           | 1.54 (0.7-2.0)            | 1.27 (0.7-1.8)          | 0.322 |
| PFA 18:3N3 (gm)               | 1.41 (0.7-1.9)           | 1.49 (0.6-2.0)            | 1.23 (0.6-1.7)          | 0.342 |
| PFA 18:4 (gm)                 | 0.002 (0.0004-0.0059)    | 0.0014 (0.0003-0.0038)    | 0.0032 (0.0007-0.0147)  | 0.109 |
| PFA 20:4 (gm)                 | 0.10 (0.05-0.17)         | 0.09 (0.04-0.18)          | 0.11 (0.08-0.16)        | 0.417 |
| PFA 20:5, EPA (gm)            | 0.02 (0.01-0.05)         | 0.019 (0.006-0.046)       | 0.027 (0.009-0.066)     | 0.166 |
| PFA 22:5 (gm)                 | 0.01 (0.007-0.029)       | 0.014 (0.005-0.029)       | 0.015 (0.010-0.031)     | 0.243 |

|                                     |                         |                         |                         |       |
|-------------------------------------|-------------------------|-------------------------|-------------------------|-------|
| PFA 22:6, DHA (gm)                  | 0.05 (0.02-0.11)        | 0.05 (0.02-0.10)        | 0.06 (0.03-0.15)        | 0.285 |
| Total PFA (gm)                      | 12.87 (7.3-18.3)        | 13.44 (7.0-22.2)        | 12.59 (7.9-15.4)        | 0.593 |
| Phenylalanine (gm)                  | 3.07 (1.4-4.7)          | 2.98 (1.3-4.7)          | 3.14 (1.9-4.7)          | 0.526 |
| Phosphorous (mg)                    | 1135.58 (594.1-1679.2)  | 1031.82 (576.5-1738.7)  | 1225.89 (624.8-1650.9)  | 0.751 |
| Phyric Acid (mg)                    | 450.98 (281.3-705.6)    | 422.27 (223.7-737.8)    | 467.28 (316.9-640.8)    | 0.812 |
| Pinitol (g)                         | 0.006 (0.001-0.027)     | 0.005 (0.001-0.026)     | 0.008 (0.002-0.036)     | 0.722 |
| Potassium (mg)                      | 2269.24 (1245.3-4008.9) | 2166.82 (1245.3-4294.4) | 2331.52 (1185.2-3379.8) | 0.812 |
| Proline (gm)                        | 4.65 (2.5-7.0)          | 4.36 (2.4-7.4)          | 4.85 (2.8-6.5)          | 0.782 |
| Animal protein (gm)                 | 47.82 (20.9-75.6)       | 43.21 (16.8-83.2)       | 47.82 (29.2-70.4)       | 0.513 |
| Protein (gm)                        | 70.66 (33.1-110.7)      | 71.4 (32.6-114.3)       | 70.39 (44.5-106.4)      | 0.751 |
| Vegetable protein (gm)              | 18.9 (14.0-28.6)        | 20.23 (10.3-24.1)       | 18.69 (15.1-30.9)       | 0.607 |
| Retinol (mcg)                       | 414.32 (253.0-662.0)    | 371.92 (230.9-831.6)    | 431.8 (315.7-614.4)     | 0.663 |
| Riboflavin (mg)                     | 1.66 (1.0-2.7)          | 1.58 (1.1-3.7)          | 1.78 (0.9-2.5)          | 0.905 |
| Saccharin (mg)                      | 0.00 (0.0-0.0)          | 0.00 (0.0-0.0)          | 0.00 (0.0-0.0)          | 1.000 |
| Synthetic Alpha-Tocopherol (mg)     | 0.04 (0.0-0.2)          | 0.03 (0.00-0.10)        | 0.05 (0.00-0.29)        | 0.496 |
| Selenium (mcg)                      | 96.18 (57.2-156.9)      | 97.37 (51.2-159.2)      | 96.18 (71.7-141.1)      | 0.692 |
| Serine (gm)                         | 3.10 (1.5-4.8)          | 3.00 (1.4-4.8)          | 3.29 (1.9-4.9)          | 0.513 |
| SFA 10:0 (gm)                       | 0.33 (0.19-0.54)        | 0.32 (0.2-0.6)          | 0.36 (0.2-0.5)          | 0.751 |
| SFA 12:0 (gm)                       | 0.54 (0.2-1.1)          | 0.55 (0.3-1.2)          | 0.52 (0.3-1.1)          | 0.953 |
| SFA 14:0 (gm)                       | 1.42 (0.9-2.9)          | 1.35 (0.9-3.2)          | 1.55 (1.1-2.0)          | 0.539 |
| SFA 16:0, palmitic acid (gm)        | 9.87 (5.9-16.4)         | 9.49 (5.1-19.1)         | 10.55 (7.6-13.5)        | 0.890 |
| SFA 17:0 (gm)                       | 0.09 (0.06-0.15)        | 0.09 (0.05-0.18)        | 0.09 (0.07-0.12)        | 0.552 |
| SFA18:0, stearic acid (gm)          | 4.49 (2.7-7.4)          | 4.08 (2.4-9.3)          | 4.88 (3.2-6.0)          | 0.968 |
| SFA 20:0 (gm)                       | 0.11 (0.06-0.18)        | 0.14 (0.06-0.23)        | 0.11 (0.9-0.14)         | 0.294 |
| SFA 22:0 (gm)                       | 0.07 (0.03-0.11)        | 0.07 (0.03-0.13)        | 0.07 (0.05-0.09)        | 0.921 |
| SFA 4:0 (gm)                        | 0.35 (0.24-0.63)        | 0.34 (0.20-0.73)        | 0.40 (0.26-0.57)        | 0.692 |
| SFA 6:0 (gm)                        | 0.21 (0.11-0.31)        | 0.20 (0.1-0.4)          | 0.22 (0.1-0.3)          | 0.751 |
| SFA 8:0 (gm)                        | 0.19 (0.9-0.30)         | 0.19 (0.1-0.3)          | 0.18 (0.1-0.3)          | 0.782 |
| Total SFA (gm)                      | 18.02 (11.1-34.4)       | 16.67 (9.8-36.7)        | 20.10 (13.9-23.9)       | 0.859 |
| Sodium (mg)                         | 2632.30 (1669.5-4087.5) | 2691.71 (1406.7-4316.2) | 2632.30 (1756.5-4069.2) | 0.782 |
| Solid Fat (g)                       | 25.15 (14.9-44.4)       | 21.72 (12.3-53.8)       | 27.65 (17.4-37.3)       | 0.663 |
| Sorbitol (g)                        | 0.18 (0.1-0.4)          | 0.21 (0.1-0.6)          | 0.18 (0.0-0.4)          | 0.464 |
| Starch (gm)                         | 72.83 (42.1-129.1)      | 70.99 (41.5-131.1)      | 76.01 (43.1-106.2)      | 0.890 |
| Sucrose polyester (gm)              | 0.01 (0.00-0.04)        | 0.01 (0.00-0.4)         | 0.01 (0.00-0.06)        | 0.646 |
| Sucralose (mg)                      | 0.00 (0.0-0.0)          | 0.00 (0.0-0.0)          | 0.00 (0.0-0.0)          | 1.000 |
| Sucrose (gm)                        | 26.21 (14.8-54.7)       | 27.27 (13.7-64.4)       | 26.21 (15.9-42.9)       | 0.722 |
| Tagatose (mg)                       | 1.02 (0.5-2.5)          | 0.85 (0.5-4.4)          | 1.26 (0.6-2.1)          | 0.828 |
| TRANS 16:1 (gm)                     | 0.03 (0.02-0.05)        | 0.03 (0.01-0.05)        | 0.03 (0.02-0.05)        | 0.513 |
| TRANS 18:1 (gm)                     | 1.81 (0.9-2.9)          | 1.49 (0.9-3.5)          | 2.02 (1.0-2.3)          | 0.968 |
| TRANS 18:2 (gm)                     | 0.28 (0.16-0.47)        | 0.23 (0.15-0.7)         | 0.32 (0.18-0.4)         | 1.000 |
| Total Grain (g)                     | 4.69 (2.9-8.1)          | 4.69 (2.7-9.2)          | 4.71 (3.3-7.4)          | 0.905 |
| Thiamin (mg)                        | 1.32 (0.8-2.0)          | 1.20 (0.7-2.1)          | 1.47 (0.9-2.0)          | 0.984 |
| Threonine (gm)                      | 2.73 (1.2-4.2)          | 2.73 (1.2-4.3)          | 2.71 (1.7-4.1)          | 0.579 |
| Total Trans-Fatty Acids (gm)        | 2.19 (1.1-3.6)          | 1.79 (1.1-4.3)          | 2.50 (1.2-2.8)          | 0.968 |
| Total Conjugated Linoleic Acid (gm) | 0.10 (0.06-0.18)        | 0.10 (0.05-0.19)        | 0.09 (0.07-0.15)        | 0.751 |
| Total Folat (mcg)                   | 314.46 (205.9-443.8)    | 304.10 (212.6-443.8)    | 320.23 (193.6-463.2)    | 0.984 |

|                                      |                         |                         |                         |       |
|--------------------------------------|-------------------------|-------------------------|-------------------------|-------|
| Total Sugar (gm)                     | 74.03 (45.6-186.2)      | 90.27 (44.7-189.6)      | 69.63 (48.3-171.6)      | 0.692 |
| Tryptophan (gm)                      | 0.79 (0.4-1.1)          | 0.78 (0.3-1.1)          | 0.79 (0.5-1.2)          | 0.621 |
| Tyrosine (gm)                        | 2.40 (1.1-3.6)          | 2.38 (1.0-3.6)          | 2.40 (1.4-3.6)          | 0.513 |
| Valine (gm)                          | 3.55 (1.6-5.5)          | 3.51 (1.5-5.5)          | 3.60 (2.2-5.4)          | 0.488 |
| Total Vit A (international units)    | 4505.01 (2494.2-8606.2) | 3686.98 (2174.6-9387.5) | 5100.58 (3731.1-8026.6) | 0.406 |
| Total Vit A (retinol activity equiv) | 574.70 (359.3-960.1)    | 517.44 (334.6-1076.9)   | 614.23 (426.2-938.0)    | 0.566 |
| Total Vit A (retinol equiv)          | 766.8 (443.5-1285.0)    | 649.73 (383.5-1374.8)   | 783.33 (595.2-1292.2)   | 0.440 |
| Vitamin B12 (mcg)                    | 5.37 (2.5-7.2)          | 5.12 (2.3-7.9)          | 5.42 (3.1-6.8)          | 0.751 |
| Vitamin B6 (mg)                      | 1.51 (1.0-2.3)          | 1.45 (1.0-2.6)          | 1.63 (0.9-2.1)          | 0.649 |
| Vitamin C (mg)                       | 54.65 (27.7-100.8)      | 64.57 (20.2-124.6)      | 47.58 (29.0-72.1)       | 0.692 |
| Vitamin D (mcg)                      | 4.68 (2.6-10.3)         | 3.89 (2.4-7.8)          | 5.93 (3.3-10.5)         | 0.205 |
| Vitamin D2 (mcg)                     | 0.001 (0.0008-0.003)    | 0.001 (0.0008-0.0024)   | 0.001 (0.0008-0.0033)   | 0.607 |
| Vitamin D3 (mcg)                     | 4.68 (2.6-10.3)         | 3.89 (2.4-7.8)          | 5.92 (3.3-10.5)         | 0.205 |
| Vitamin E (international units)      | 8.58 (5.2-12.1)         | 8.69 (4.3-15.0)         | 8.58 (5.9-10.5)         | 0.905 |
| Vitamin K (mcg)                      | 63.43 (41.2-115.2)      | 66.45 (38.8-152.8)      | 61.56 (41.9-79.5)       | 0.373 |
| Water (gm)                           | 2714.72 (1378.5-4175.4) | 2838.78 (1872.4-4845.8) | 2657.88 (1109.6-3529.3) | 0.294 |
| Whole Grain (g)                      | 0.81 (0.3-1.9)          | 0.62 (0.2-1.5)          | 0.93 (0.4-1.9)          | 0.243 |
| Xylitol (g)                          | 0.007 (0.004-0.014)     | 0.009 (0.004-0.035)     | 0.006 (0.004-0.010)     | 0.267 |
| Zinc (mg)                            | 9.05 (4.9-13.4)         | 8.43 (3.9-15.7)         | 9.63 (5.7-11.4)         | 0.707 |

\* Denotes statistically significant difference after performing a Man-Whitney U Test.
